# Supplementary material for: Adverse Childhood Experiences Predict Common Neurodevelopmental and Behavioral Health Conditions among U.S. Children
Source: MDPI journal article supplement (doi:10.3390/children8090761), 2021-08-31
Supplement: s1 [file s1]

## Supplemental

**Table S1.** Questions from the National Survey of Child Health used in analyses.

---

### Adverse Childhood Experiences (ACE) Questions

To the best of your knowledge, has this child EVER experienced any of the following?

Parent or guardian divorced or separated

1 = Yes

2 = No

To the best of your knowledge, has this child EVER experienced any of the following?

Parent or guardian died

1 = Yes

2 = No

To the best of your knowledge, has this child EVER experienced any of the following?

Parent or guardian served time in jail

1 = Yes

2 = No

To the best of your knowledge, has this child EVER experienced any of the following?

Saw or heard parents or adults slap, hit, kick, punch one another in the home

1 = Yes

2 = No

To the best of your knowledge, has this child EVER experienced any of the following?

Lived with anyone who was mentally ill, suicidal, or severely depressed

1 = Yes

2 = No

To the best of your knowledge, has this child EVER experienced any of the following?

Lived with anyone who had a problem with alcohol or drugs

1 = Yes

2 = No

Since this child was born, how often has it been very hard to cover the basics, like food or housing, on your family's income?

1 = Never

2 = Rarely

3 = Somewhat often

4 = Very often

### Health Condition/Diagnosis-Related Questions

Has a doctor or other health care provider EVER told you that this child has...

Autism or Autism Spectrum Disorder (ASD)? Include diagnoses of Asperger's Disorder or Pervasive Developmental Disorder (PDD).

1 = Yes

2 = No

Has a doctor or other health care provider EVER told you that this child has Attention Deficit Disorder or Attention-Deficit/Hyperactivity Disorder, that is, ADD or ADHD?

1 = Yes

2 = No

Has a doctor or other health care provider EVER told you that this child has Epilepsy or seizure disorder?

1 = Yes

2 = No

Has a doctor or other health care provider EVER told you that this child has Cerebral Palsy?

1 = Yes

2 = No

Has a doctor or other health care provider EVER told you that this child has Down Syndrome?

1 = Yes

2 = No

Has a doctor, other health care provider, or educator EVER told you that this child has Intellectual Disability (formerly known as Mental Retardation)? Examples of educators are teachers and school nurses.

---

---

1 = Yes  
2 = No

Has a doctor, other health care provider, or educator EVER told you that this child has Developmental Delay? Examples of educators are teachers and school nurses.

1 = Yes  
2 = No

Has a doctor, other health care provider, or educator EVER told you that this child has Learning Disability? Examples of educators are teachers and school nurses.

1 = Yes  
2 = No

Has a doctor or other health care provider EVER told you that this child has Anxiety Problems?

1 = Yes  
2 = No

Has a doctor or other health care provider EVER told you that this child has Depression?

1 = Yes  
2 = No

Has a doctor or other health care provider EVER told you that this child has Substance Use Disorder?

1 = Yes  
2 = No

Has a doctor, other health care provider, or educator EVER told you that this child has Behavioral or Conduct Problems? Examples of educators are teachers and school nurses.

1 = Yes  
2 = No

Has a doctor or other health care provider EVER told you that this child has Tourette Syndrome?

1 = Yes  
2 = No

Has a doctor, other health care provider, or educator EVER told you that this child has Speech or other language disorder? Examples of educators are teachers and school nurses.

1 = Yes  
2 = No

Has a doctor or other health care provider EVER told you that this child has Frequent or severe headaches, including migraine?

1 = Yes  
2 = No

---

**Table S2.** Tests of orthogonal polynomial contrasts for ACE scores predicting neurodevelopmental and behavioral outcomes.

|                                          | Linear Contrast |          | Quadratic Contrast |          | Cubic Contrast |          |
|------------------------------------------|-----------------|----------|--------------------|----------|----------------|----------|
| Model Coefficients                       |                 |          |                    |          |                |          |
| ACE = 0                                  | -1.211          |          | 1.107              |          | -0.555         |          |
| ACE = 1                                  | -0.499          |          | -0.694             |          | 1.507          |          |
| ACE = 2                                  | 0.214           |          | -1.257             |          | -1.172         |          |
| ACE ≥ 3 (mean 3.8)                       | 1.496           |          | 0.844              |          | 0.220          |          |
|                                          |                 |          |                    |          |                |          |
|                                          | F-Value         | P-Value  | F-Value            | P-Value  | F-Value        | P-Value  |
| Outcomes                                 |                 |          |                    |          |                |          |
| Down Syndrome                            | 0.67            | 0.4121   | 0.05               | 0.8257   | 0.04           | 0.8396   |
| Tourette Syndrome                        | 4.57            | 0.0325   | 1.80               | 0.18     | 0.01           | 0.9169   |
| Cerebral Palsy                           | 3.10            | 0.0782   | 2.04               | 0.1537   | 0.04           | 0.8477   |
| Epilepsy                                 | 4.65            | 0.0310   | 10.05              | 0.0015   | 2.89           | 0.0894   |
| Speech Disorder                          | 18.13           | <0.0001* | 57.70              | <0.0001* | 0.40           | 0.5248   |
| Autism Spectrum Disorder                 | 11.65           | 0.0006*  | 29.92              | <0.0001* | 0.08           | 0.7760   |
| Intellectual Disability                  | 4.01            | 0.0453   | 12.49              | 0.0004*  | 9.09           | 0.0026   |
| Headaches/Migraine                       | 22.23           | <0.0001* | 126.68             | <0.0001* | 2.68           | 0.1014   |
| Developmental Delay                      | 50.09           | <0.0001* | 153.69             | <0.0001* | 16.13          | <0.0001* |
| Learning Disability                      | 46.16           | <0.0001* | 186.31             | <0.0001* | 9.06           | 0.0026   |
| Attention-Deficit/Hyperactivity Disorder | 79.41           | <0.0001* | 349.38             | <0.0001* | 19.41          | <0.0001* |
| Anxiety Problems                         | 91.78           | <0.0001* | 401.27             | <0.0001* | 39.61          | <0.0001* |
| Behavior/Conduct Problems                | 120.52          | <0.0001* | 562.23             | <0.0001* | 49.03          | <0.0001* |
| Depression                               | 104.32          | <0.0001* | 473.99             | <0.0001* | 49.39          | <0.0001* |
| Substance Use Disorder                   | 3.49            | 0.0617   | 16.01              | <0.0001* | 12.19          | 0.0005*  |

\* P value <0.001 (Bonferroni-corrected P < 0.05).
